# Supplementary material for: G1 Cell Cycle Arrest Is Induced by the Fourth Extracellular Loop of Meningococcal PorA in Epithelial and Endothelial Cells
Source: Hindawi journal article supplement (doi:10.1155/2023/7480033), 2023-03-28
Supplement: f1 [file 7480033.f1.docx]

**G1 cell cycle arrest is induced by the fourth extracellular loop of meningococcal PorA in epithelial and endothelial cells**

Matthew Vassey†,‡, Rininta Firdaus†,§, Akhmed Aslam‖, Lee M. Wheldon, Neil J. Oldfield, Dlawer A. A. Ala’Aldeen¶, and Karl G. Wooldridge*

Molecular Bacteriology and Immunology Group, School of Life Sciences, University of Nottingham, UK

* corresponding author

† these authors contributed equally to this work

‡ current affiliation: College of Health and Life Sciences, Aston University, Birmingham, UK

§ current affiliation: Department of Biomaterials, Institute of Clinical Science, Sahlgrenska Academy, University of Gothenburg, Sweden

‖ current affiliation: Faculty of Applied Medical Sciences, Umm Al-Qura University, Makkah, Saudi Arabia

¶ current affiliation: Middle East Research Institute, Erbil, Kurdistan Region of Iraq.

**Mailing address:**

Life Sciences Building, University of Nottingham, University Park, Nottingham, NG7 2RD.

Email: [karl.wooldridge@nottingham.ac.uk](mailto:karl.wooldridge@nottingham.ac.uk)

Tel: +44 115 82 30743

**Running title:** PorA-Loop4 induces G1 cell cycle arrest.

**Keywords:** Meningococci, LamR, PorA, extracellular Loop4, cell cycle arrest, epithelial, endothelial, host-pathogen

***Supplementary table***

**Table S1. Effect of PorA-Loop4 on the proportion of D562 and HCT116 cells in G1 phase**

| **% of cell population** | | **Untreated** | **scLoop4** | **Loop4** | **Serum starved** | **Nocodazole** |
| --- | --- | --- | --- | --- | --- | --- |
| D562 | G1 | 50.7 | 51.1 | 59.5 | 48.3 | 17.9 |
| S | 31.7 | 30.4 | 23.1 | 25.1 | 12 |
| G2/M | 14.9 | 14.9 | 14.8 | 24.1 | 57.3 |
|  |  |  |  |  |  |  |
| **% of cell population** | | **Untreated** | **scLoop4** | **Loop4** | **Serum starved** | **Nocodazole** |
| HCT116 | G1 | 64.5 | 61.1 | 72.3 | 76.5 | 17.4 |
| S | 20.6 | 23.1 | 14.6 | 6.0 | 6.0 |
| G2/M | 9.2 | 7.4 | 7.8 | 7.1 | 57.0 |

##
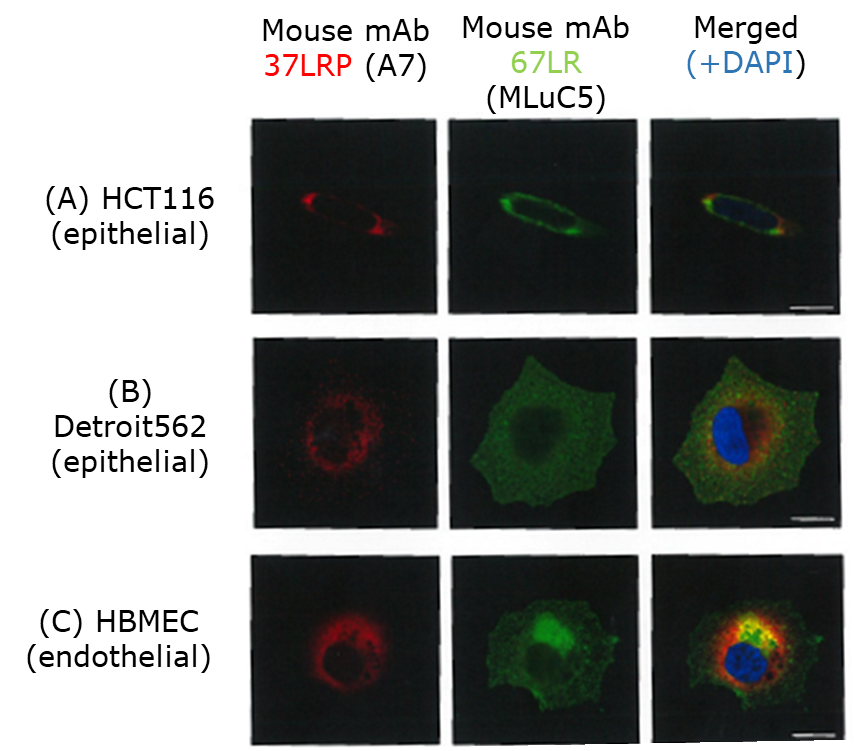
Supplementary Figures

**Figure S1. 37LRP and 67LR exhibit distinct staining patterns on host cell surfaces.** 67LR (green) presents a diffuse pattern across the entire cell surface while the 37LRP (red) exhibits more specific punctate staining in the peri-nuclear region on the cell surface. The figures show the cell-surface staining for both isoforms on HCT116 cells on fibronectin substrate (human colon epithelial, P21) (A), D562 cells on fibronectin substrate (human nasopharyngeal, P5) (B), and HBMECs on fibronectin substrate (human endothelial, P11) (C). Cells were grown on coverslips before fixing with 4% paraformaldehyde. Cells were stained with anti-37LRP (A7, 1:1000) and anti-67LR (MLuC5, 1:1000) followed by secondary Alexa antibody (Alexa 488 and 647). Merged images also show DAPI staining (Blue). Coverslips were mounted using ProLong Gold antifade mounting reagent. Scale bar = 20 µm. Images representative of at least 3 independent experiments.

**
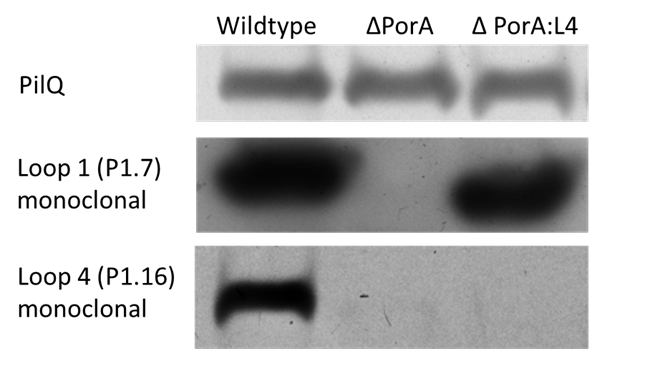
**

**Figure S2. Immunoblot confirmation of isogenic strains of *N. meningitidis* MC58.** Bacteria were grown overnight in BHI broth. Samples were lysed in sample buffer and separated on a 10% Tris-Glycine SDS-PAGE gel. After transfer to nitrocellulose membrane, blots were probed with anti-Loop 1 (P1.7) (1:1000), anti-Loop4 (P1.16) (1:1000) or anti-PilQ (1:1000) as a loading control. Subsequent detection was carried out with anti-mouse HRP (1:100,000) or anti-rabbit HRP (1:120,000).


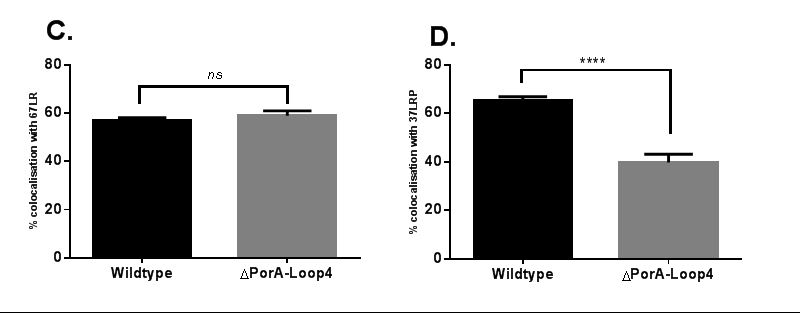


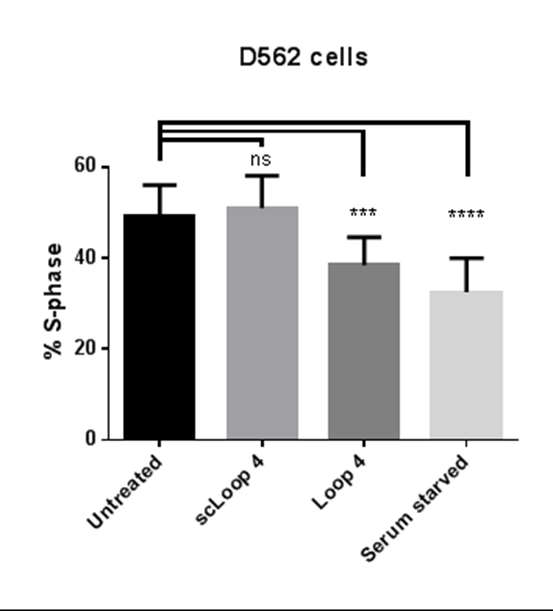
**Figure S3. *N. meningitidis*-associated recruitment of 37LRP or 67LR on the surface of HBMECs.** HBMECs were infected with either wild-type *N. meningitidis* MC58 (black bars) or MC58 ∆PorA-Loop4 (grey bars) and then fixed and stained to assess co-localisation of 67LRP (left panel) and 37LR (right panel) with bacterial colonies (stained with DAPI). Data represents at least 100 colonies measured across three independent experiments (****p ≤ 0.001; one-way ANOVA).

**Figure S4. EdU incorporation of D562 cells.** Detroit 562s were treated with either PorA-Loop4 (50 µM), PorA-Scr Loop4 (50 µM) or serum deprived for 24 h. During the final 2 h of incubation, 20 μM of Edu was added and incorporated into S-phase cells. Cells were washed, fixed and stained with DAPI and anti-EdU antibody and analysed by confocal microscopy. The proportion of S-phase cells (EdU+ labelled cells) as a percentage of the total cell number (as determined by DAPI staining) is shown. Each bar represents the Mean + SEM of 30 fields per treatment from three independent experiments. Significant difference compared to untreated (***p ≤ 0.001, ****p ≤ 0.0001) ANOVA (with Dunnett’s test applied post hoc).
